# Supplementary material
Source: publisher site journal article supplement (https://www.dovepress.com/article/457455)
Supplement: Supplementary file 1 [file get_supplementary_file.php]

| **Table S1.** Sociodemographic characteristics, lifestyle and metabolic parameters are divided into binary categories by VFA status. | | | | |
| --- | --- | --- | --- | --- |
| **Characteristic** | **Non-central obesity** | | **Central obesity** | **P value** |
| N=571 | N=386 | |
| Sex: male, *N* (%) | 160 (28.0%) | 226 (58.5%) | | 0.000* |
| Age (y) | 52.4 ± 6.7 | 54.2 ± 6.6 | | 0.000*a |
| Smoke, *N* (%) | 125 (21.9%) | 170 (44.0%) | | 0.000* |
| Alcohol use, *N* (%) | 199 (34.9%) | 212 (54.9%) | | 0.000* |
| Drink tea, *N* (%) | 384 (67.3%) | 283 (73.3%) | | 0.045* |
| Sleep duration (≥8 h/day), *N* (%) | 262 (45.9%) | 188 (48.7%) | | 0.391 |
| Marital status: married, *N* (%) | 537 (94.0%) | 363 (94.0%) | | 0.998 |
| Education, *N* (%) # |  |  | | 0.755 |
| Illiterate or primary | 53 (9.3%) | 41 (10.6%) | |  |
| Junior high school | 261 (45.7%) | 170 (44.2%) | |  |
| High school or higher | 257 (45.0%) | 174 (45.2%) | |  |
| Dietary pattern, *N* (%) |  |  | | 0.004* |
| Meat-based diet | 38 (6.7%) | 37 (9.6%) | |  |
| Half meat half vegetarian | 380 (66.5%) | 279 (72.3%) | |  |
| Vegetarian diet | 153 (26.8%) | 70 (18.1%) | |  |
| Physical activity, *N* (%) |  |  | | 0.177 |
| Low | 117 (20.5%) | 97 (25.1%) | |  |
| Moderate | 284 (49.7%) | 189 (49.0%) | |  |
| High | 170 (29.8%) | 100 (25.9%) | |  |
| Sitting time, *N* (%) |  |  | | 0.097 |
| ≤3 (h/day) | 211 (37.0%) | 159 (41.2%) | |  |
| 3-6 (h/day) | 224 (39.2%) | 125 (32.4%) | |  |
| >6 (h/day) | 136 (23.8%) | 102 (26.4%) | |  |
| Abdominal WC, *N* (%) | 18 (3.2%) | 144 (37.3%) | | 0.000* |
| Increased glucose concentration, *N* (%) | 81 (14.2%) | 110 (28.5%) | | 0.000* |
| Elevated blood pressure, *N* (%) | 238 (41.7%) | 276 (71.5%) | | 0.000* |
| Increased TG concentration, *N* (%) | 104 (18.2%) | 190 (49.2%) | | 0.000* |
| Decreased HDL-C concentration, *N* (%) | 25 (4.4%) | 63 (16.3%) | | 0.000* |
| MetS, *N* (%) | 24 (4.2%) | 133 (34.5%) | | 0.000* |
| Note: Values are presented as mean ± standard deviation (SD), or percent prevalence. P values calculated by chi-square test unless otherwise indicated. VFA, visceral fat area; MetS, metabolic syndrome; WC, waist circumference; TG, triglyceride; HDL-C, high-density lipoprotein cholesterol. #Education was missing for 1 participant; therefore, total add up to 956. Versus group of non-central obesity, *P<0.05. a T-test P value. | | | | |
